# Supplementary material for: T1 vs. T2 weighted magnetic resonance imaging to assess total kidney volume in patients with autosomal dominant polycystic kidney disease
Source: PubMed Central journal article supplement (PMC5904223; doi:10.1007/s00261-017-1285-2), 2017-09-04
Supplement: 261_2017_1285_MOESM4_ESM.pdf [file 261_2017_1285_MOESM4_ESM.pdf]

**T1 versus T2 weighted Magnetic Resonance Imaging  
to Assess Total Kidney Volume  
in Patients with Autosomal Dominant Polycystic Kidney Disease**

***Journal: Abdominal Radiology***

Maatje D.A. van Gastel \*, BSc<sup>1</sup>; A. Lianne Messchendorp \*, MD<sup>1</sup>; Peter Kappert, MSc<sup>2</sup>; Merel A. Kaatee, BSc<sup>1,3</sup>; Marissa de Jong, BSc<sup>1</sup>; Remco J. Renken, MSc, PhD<sup>4</sup>; Gert J. ter Horst, MSc, PhD<sup>4</sup>; Shekar V.K. Mahesh, MD<sup>2</sup> and Ron T. Gansevoort, MD, PhD<sup>1</sup>.

On behalf of the DIPAK consortium

Departments of <sup>1</sup>Nephrology, <sup>2</sup>Radiology, <sup>3</sup>Center for Medical Imaging and <sup>4</sup>Neuro Imaging Center, University of Groningen, University Medical Center Groningen, Groningen, the Netherlands.

\* both authors contributed equally to this work

**Correspondence:** Ron T. Gansevoort

**Email:** r.t.gansevoort@umcg.nl

**Supplementary Table 4.** Kidney growth (change in kidney volumes) for 1.5 versus 3 Tesla, as well as different manufacturers.

|                                            | <b>T1</b>     | <b>T2</b>     | <b>P value</b> |
|--------------------------------------------|---------------|---------------|----------------|
| <b>Left kidney</b>                         |               |               |                |
| Change (mL)                                |               |               |                |
| <i>Magneto Avanto, Siemens<sup>1</sup></i> | 28.4 ± 131.4  | 67.6 ± 110.6  | 0.2            |
| <i>Ingenia, Philips<sup>1</sup></i>        | 119.8 ± 188.3 | 128.9 ± 190.5 | 0.4            |
| <i>GE Medical Systems<sup>1</sup></i>      | 72.2 ± 99.9   | 81.7 ± 108.6  | 0.6            |
| <i>3 Tesla scanner</i>                     | 83.3 ± 16.1   | 144.5 ± 70.2  | 0.1            |
| Change (%)                                 |               |               |                |
| <i>Magneto Avanto, Siemens<sup>1</sup></i> | 5.1 ± 7.1     | 5.3 ± 9.8     | 0.9            |
| <i>Ingenia, Philips<sup>1</sup></i>        | 9.4 ± 16.0    | 10.1 ± 16.2   | 0.5            |
| <i>GE Medical Systems<sup>1</sup></i>      | 6.8 ± 12.1    | 8.9 ± 14.9    | 0.4            |
| <i>3 Tesla scanner<sup>2</sup></i>         | 10.1 ± 2.7    | 17.4 ± 6.9    | 0.1            |
| <b>Right kidney</b>                        |               |               |                |
| Change (mL)                                |               |               |                |
| <i>Magneto Avanto, Siemens<sup>1</sup></i> | 137.6 ± 198.0 | 141.0 ± 240.7 | 0.9            |
| <i>Ingenia, Philips<sup>1</sup></i>        | 95.6 ± 102.8  | 114.1 ± 120.0 | 0.1            |
| <i>GE Medical Systems<sup>1</sup></i>      | 55.0 ± 137.7  | 88.1 ± 88.1   | 0.3            |
| <i>3 Tesla scanner<sup>2</sup></i>         | 91.2 ± 19.7   | 130.7 ± 46.0  | 0.06           |
| Change (%)                                 |               |               |                |
| <i>Magneto Avanto, Siemens<sup>1</sup></i> | 13.3 ± 12.9   | 12.9 ± 11.6   | 0.9            |
| <i>Ingenia, Philips<sup>1</sup></i>        | 9.1 ± 7.8     | 11.3 ± 10.0   | 0.1            |
| <i>GE Medical Systems<sup>1</sup></i>      | 5.0 ± 17.5    | 9.4 ± 12.0    | 0.3            |
| <i>3 Tesla scanner<sup>2</sup></i>         | 11.0 ± 2.2    | 16.1 ± 5.2    | 0.07           |
| <b>Total kidney</b>                        |               |               |                |
| Change (mL)                                |               |               |                |
| <i>Magneto Avanto, Siemens<sup>1</sup></i> | 166.0 ± 233.6 | 208.5 ± 296.1 | 0.3            |
| <i>Ingenia, Philips<sup>1</sup></i>        | 215.5 ± 268.0 | 243.0 ± 291.1 | 0.1            |
| <i>GE Medical Systems<sup>1</sup></i>      | 127.2 ± 223.9 | 169.7 ± 195.7 | 0.3            |
| <i>3 Tesla scanner<sup>2</sup></i>         | 174.5 ± 30.9  | 275.1 ± 112.1 | 0.09           |
| Change (%)                                 |               |               |                |
| <i>Magneto Avanto, Siemens<sup>1</sup></i> | 8.3 ± 7.4     | 8.3 ± 8.2     | 0.9            |
| <i>Ingenia, Philips<sup>1</sup></i>        | 9.3 ± 11.3    | 10.8 ± 12.6   | 0.1            |
| <i>GE Medical Systems<sup>1</sup></i>      | 5.8 ± 14.2    | 9.0 ± 13.4    | 0.2            |
| <i>3 Tesla scanner<sup>2</sup></i>         | 10.4 ± 1.8    | 16.5 ± 5.2    | 0.08           |

Values are given as mean ± standard deviation or median [IQR]. P values were calculated using a paired Wilcoxon signed rank test for differences between T1 and T2 weighted volumes, for differences in change in volumes between T1 and T2 a paired T-test was used. ANOVA showed no significant difference between any of the four scanners. 1. 1.5 Tesla scanner; 2. Inera, Philips and Magnetom TRIO, Siemens.
