# Supplementary material for: T1 vs. T2 weighted magnetic resonance imaging to assess total kidney volume in patients with autosomal dominant polycystic kidney disease
Source: PubMed Central journal article supplement (PMC5904223; doi:10.1007/s00261-017-1285-2), 2017-09-04
Supplement: 261_2017_1285_MOESM5_ESM.pdf [file 261_2017_1285_MOESM5_ESM.pdf]

**T1 versus T2 weighted Magnetic Resonance Imaging  
to Assess Total Kidney Volume  
in Patients with Autosomal Dominant Polycystic Kidney Disease**

***Journal: Abdominal Radiology***

Maatje D.A. van Gastel \*, BSc<sup>1</sup>; A. Lianne Messchendorp \*, MD<sup>1</sup>; Peter Kappert, MSc<sup>2</sup>;  
Merel A. Kaatee, BSc<sup>1,3</sup>; Marissa de Jong, BSc<sup>1</sup>; Remco J. Renken, MSc, PhD<sup>4</sup>; Gert J. ter  
Horst, MSc, PhD<sup>4</sup>; Shekar V.K. Mahesh, MD<sup>2</sup> and Ron T. Gansevoort, MD, PhD<sup>1</sup>.

On behalf of the DIPAK consortium

Departments of <sup>1</sup>Nephrology, <sup>2</sup>Radiology, <sup>3</sup>Center for Medical Imaging and <sup>4</sup>Neuro Imaging  
Center, University of Groningen, University Medical Center Groningen, Groningen, the  
Netherlands.

\* both authors contributed equally to this work

**Correspondence:** Ron T. Gansevoort

**Email:** r.t.gansevoort@umcg.nl

**Supplementary Table 5.** Percentage of approved scans when using T1 or T2 weighted images per MRI scanner.

|                                             | <b>T1 [n (%)]</b> | <b>T2 [n (%)]</b> | <b>P value</b> |
|---------------------------------------------|-------------------|-------------------|----------------|
| <i>Magneto Avanto, Siemens</i> <sup>1</sup> | 37 (64.9)         | 51 (89.5)         | 0.002          |
| <i>Ingenia, Philips</i> <sup>1</sup>        | 57 (74.0)         | 70 (90.9)         | 0.006          |
| <i>GE Medical Systems</i> <sup>1</sup>      | 49 (75.4)         | 55 (84.6)         | 0.19           |
| <i>3 Tesla scanner</i> <sup>2</sup>         | 76 (69.7)         | 91 (83.5)         | 0.02           |
| <b>P value</b>                              | 0.6               | 0.4               |                |

Values represent the number of MR images suitable for volume measurement. P values were calculated using a Chi-square test. 1. 1.5 Tesla scanner; 2. Intera, Philips and Magnetom TRIO, Siemens.
