# Supplementary material for: T1 vs. T2 weighted magnetic resonance imaging to assess total kidney volume in patients with autosomal dominant polycystic kidney disease
Source: Springer Nature journal article supplement (doi:10.1007/s00261-017-1285-2), 2017-09-04
Supplement: MOESM1 [file 14976096]

**T1 versus T2 weighted Magnetic Resonance Imaging  
to Assess Total Kidney Volume  
in Patients with Autosomal Dominant Polycystic Kidney Disease**

***Journal: Abdominal Radiology***

Maatje D.A. van Gastel \*, BSc<sup>1</sup>; A. Lianne Messchendorp \*, MD<sup>1</sup>; Peter Kappert, MSc<sup>2</sup>; Merel A. Kaatee, BSc<sup>1,3</sup>; Marissa de Jong, BSc<sup>1</sup>; Remco J. Renken, MSc, PhD<sup>4</sup>; Gert J. ter Horst, MSc, PhD<sup>4</sup>; Shekar V.K. Mahesh, MD<sup>2</sup> and Ron T. Gansevoort, MD, PhD<sup>1</sup>.

On behalf of the DIPAK consortium

Departments of <sup>1</sup>Nephrology, <sup>2</sup>Radiology, <sup>3</sup>Center for Medical Imaging and <sup>4</sup>Neuro Imaging Center, University of Groningen, University Medical Center Groningen, Groningen, the Netherlands.

\* both authors contributed equally to this work

**Correspondence:** Ron T. Gansevoort

**Email:** r.t.gansevoort@umcg.nl

**Supplementary Table 1.** Intra- and interreader coefficients of variability in kidney volume measurements (three readers), for 1.5 versus 3 Tesla, as well as different manufacturers.

|                                             | Intrareader CV (%) |                    | Interreader CV (%)  |                    |
|---------------------------------------------|--------------------|--------------------|---------------------|--------------------|
|                                             | T1                 | T2                 | T1                  | T2                 |
| <b>Left kidney</b>                          | P=0.5              | P=0.1              | P=0.2               | P=0.9              |
| <i>Magneto Avanto, Siemens</i> <sup>1</sup> | 1.40 [0.53 - 1.64] | 0.62 [0.38 - 0.83] | 1.62 [1.41 - 4.42]  | 0.98 [0.87 - 1.25] |
| <i>Ingenia, Philips</i> <sup>1</sup>        | 1.10 [0.56 - 2.62] | 0.80 [0.43 - 1.52] | 1.20 [0.72 - 3.33]  | 0.95 [0.34 - 2.60] |
| <i>GE Medical Systems</i> <sup>1</sup>      | 0.97 [0.88 - 1.77] | 0.86 [0.29 - 1.21] | 3.65 [3.09 - 4.95]  | 1.61 [0.43 - 2.22] |
| <i>3 Tesla scanner</i> <sup>2</sup>         | 0.47 [0.15 - 1.77] | 0.21 [0.08 - 0.64] | 1.10 [0.92 - 1.63]  | 1.02 [0.98 - 1.02] |
| <b>Right kidney</b>                         | P=0.6              | P=0.9              | P=0.06              | P=0.5              |
| <i>Magneto Avanto, Siemens</i> <sup>1</sup> | 1.78 [0.93 - 2.55] | 0.81 [0.33 - 0.94] | 0.59 [0.54 - 3.26]  | 0.76 [0.34 - 1.92] |
| <i>Ingenia, Philips</i> <sup>1</sup>        | 1.57 [1.17 - 2.14] | 0.65 [0.11 - 1.68] | 1.95 [0.52 - 2.00]  | 1.85 [0.90 - 2.41] |
| <i>GE Medical Systems</i> <sup>1</sup>      | 1.35 [0.56 - 2.05] | 0.61 [0.34 - 1.40] | 4.37 [4.13 - 17.27] | 1.00 [0.74 - 1.31] |
| <i>3 Tesla scanner</i> <sup>2</sup>         | 0.86 [0.67 - 1.96] | 0.56 [0.31 - 0.83] | 3.47 [1.74 - 3.99]  | 1.42 [1.19 - 1.90] |
| <b>Total kidney</b>                         | P=0.2              | P=0.3              | P=0.09              | P=0.2              |
| <i>Magneto Avanto, Siemens</i> <sup>1</sup> | 1.67 [0.96 - 2.00] | 0.98 [0.42 - 1.37] | 1.05 [0.85 - 3.87]  | 1.76 [1.04 - 2.42] |
| <i>Ingenia, Philips</i> <sup>1</sup>        | 1.04 [0.20 - 1.61] | 1.57 [0.52 - 2.82] | 1.53 [1.05 - 1.85]  | 2.67 [1.97 - 5.09] |
| <i>GE Medical Systems</i> <sup>1</sup>      | 0.83 [0.25 - 2.03] | 0.79 [0.54 - 2.24] | 4.64 [3.88 - 8.12]  | 1.54 [1.48 - 2.19] |
| <i>3 Tesla scanner</i> <sup>2</sup>         | 0.41 [0.27 - 1.41] | 0.74 [0.10 - 1.24] | 1.37 [1.14 - 2.09]  | 2.29 [2.17 - 3.37] |

Values are given as median [IQR] for intrareader CV and median [minimum-maximum] for interreader CV. P values show differences between the four scanner types, using a Kruskal Wallis Test. 1. 1.5 Tesla scanner; 2. Magnetom TRIO, Siemens. *Abbreviations:* CV, coefficient of variability.
