# Supplementary material for: T1 vs. T2 weighted magnetic resonance imaging to assess total kidney volume in patients with autosomal dominant polycystic kidney disease
Source: Springer Nature journal article supplement (doi:10.1007/s00261-017-1285-2), 2017-09-04
Supplement: MOESM2 [file 14976096]

**T1 versus T2 weighted Magnetic Resonance Imaging  
to Assess Total Kidney Volume  
in Patients with Autosomal Dominant Polycystic Kidney Disease**

***Journal: Abdominal Radiology***

Maatje D.A. van Gastel \*, BSc<sup>1</sup>; A. Lianne Messchendorp \*, MD<sup>1</sup>; Peter Kappert, MSc<sup>2</sup>; Merel A. Kaatee, BSc<sup>1,3</sup>; Marissa de Jong, BSc<sup>1</sup>; Remco J. Renken, MSc, PhD<sup>4</sup>; Gert J. ter Horst, MSc, PhD<sup>4</sup>; Shekar V.K. Mahesh, MD<sup>2</sup> and Ron T. Gansevoort, MD, PhD<sup>1</sup>.

On behalf of the DIPAK consortium

Departments of <sup>1</sup>Nephrology, <sup>2</sup>Radiology, <sup>3</sup>Center for Medical Imaging and <sup>4</sup>Neuro Imaging Center, University of Groningen, University Medical Center Groningen, Groningen, the Netherlands.

\* both authors contributed equally to this work

**Correspondence:** Ron T. Gansevoort

**Email:** r.t.gansevoort@umcg.nl

**Supplementary Table 2.** Differences in kidney volume when measured using T1 or T2 weighted images for 1.5 versus 3 Tesla, as well as different manufacturers.

|                                             | Volumes (mL)       |                    | Differences in volume (mL) |           |                  | Differences in volume (%)        |           |                             |
|---------------------------------------------|--------------------|--------------------|----------------------------|-----------|------------------|----------------------------------|-----------|-----------------------------|
|                                             | T1                 | T2                 | [T1 – T2]                  |           |                  | [(T1 – T2) / average T1 T2* 100] |           |                             |
|                                             |                    |                    | Bias                       | Precision | <i>P value</i> * | Bias                             | Precision | <i>P value</i> <sup>#</sup> |
| <b>Left kidney</b>                          |                    |                    |                            |           |                  |                                  |           |                             |
| <i>Magneto Avanto, Siemens</i> <sup>1</sup> | 1034 [484 - 2257]  | 1026 [460 - 2229]  | 10.1                       | 115.0     | 0.2              | 1.0                              | 6.7       | 0.5                         |
| <i>Ingenia, Philips</i> <sup>1</sup>        | 1075 [721 - 1260]  | 1086 [758 - 1333]  | -20.5                      | 37.1      | 0.03             | -1.9                             | 3.8       | 0.04                        |
| <i>GE Medical Systems</i> <sup>1</sup>      | 983 [655 - 1174]   | 977 [654 - 1195]   | -0.2                       | 57.1      | 0.6              | 1.2                              | 5.2       | 0.3                         |
| <i>3 Tesla scanner</i> <sup>2</sup>         | 905 [715 - 1278]   | 939 [722 - 1365]   | -30.3                      | 80.9      | 0.1              | -2.2                             | 6.1       | 0.2                         |
| <b>Right kidney</b>                         |                    |                    |                            |           |                  |                                  |           |                             |
| <i>Magneto Avanto, Siemens</i> <sup>1</sup> | 813 [353 - 1802]   | 853 [374 - 1851]   | -36.9                      | 72.8      | 0.008            | -3.0                             | 5.3       | 0.008                       |
| <i>Ingenia, Philips</i> <sup>1</sup>        | 828 [680 - 1319]   | 873 [681 - 1384]   | -28.7                      | 37.3      | 0.004            | -1.8                             | 6.0       | 0.2                         |
| <i>GE Medical Systems</i> <sup>1</sup>      | 892 [560 - 1049]   | 898 [513 - 1136]   | -13.7                      | 83.2      | 0.2              | 0.4                              | 10.7      | 0.9                         |
| <i>3 Tesla scanner</i> <sup>2</sup>         | 857 [712 - 1072]   | 837 [729 - 1081]   | -8.0                       | 35.8      | 0.3              | -0.9                             | 4.0       | 0.4                         |
| <b>Total kidney</b>                         |                    |                    |                            |           |                  |                                  |           |                             |
| <i>Magneto Avanto, Siemens</i> <sup>1</sup> | 1800 [785 - 4031]  | 1810 [785 - 4090]  | -26.8                      | 154.0     | 0.3              | -0.7                             | 4.7       | 0.4                         |
| <i>Ingenia, Philips</i> <sup>1</sup>        | 2008 [1418 - 2774] | 2054 [1448 - 2773] | -49.2                      | 64.1      | 0.005            | -1.8                             | 4.3       | 0.07                        |
| <i>GE Medical Systems</i> <sup>1</sup>      | 1883 [1186 - 2203] | 1902 [1152 - 2317] | -14.0                      | 122.8     | 0.7              | 0.8                              | 6.4       | 0.8                         |
| <i>3 Tesla scanner</i> <sup>2</sup>         | 1798 [1461 - 2262] | 1792 [1469 - 2363] | -38.2                      | 107.8     | 0.08             | -1.7                             | 4.9       | 0.2                         |

Values are given as median [IQR]. P values shown are: \* absolute differences (mL) between T1 and T2 weighted volumes using a paired Wilcoxon signed rank test; <sup>#</sup> percentage differences (%) between T1 and T2 weighted volumes using a one sample T-test. ANOVA showed no significant difference between the scanners for absolute and percentage difference. 1. 1.5 Tesla scanner; 2. Intera, Philips and Magnetom TRIO, Siemens.
