# Supplementary material for: T1 vs. T2 weighted magnetic resonance imaging to assess total kidney volume in patients with autosomal dominant polycystic kidney disease
Source: Springer Nature journal article supplement (doi:10.1007/s00261-017-1285-2), 2017-09-04
Supplement: MOESM3 [file 14976096]

**T1 versus T2 weighted Magnetic Resonance Imaging  
to Assess Total Kidney Volume  
in Patients with Autosomal Dominant Polycystic Kidney Disease**

***Journal: Abdominal Radiology***

Maatje D.A. van Gastel \*, BSc<sup>1</sup>; A. Lianne Messchendorp \*, MD<sup>1</sup>; Peter Kappert, MSc<sup>2</sup>; Merel A. Kaatee, BSc<sup>1,3</sup>; Marissa de Jong, BSc<sup>1</sup>; Remco J. Renken, MSc, PhD<sup>4</sup>; Gert J. ter Horst, MSc, PhD<sup>4</sup>; Shekar V.K. Mahesh, MD<sup>2</sup> and Ron T. Gansevoort, MD, PhD<sup>1</sup>.

On behalf of the DIPAK consortium

Departments of <sup>1</sup>Nephrology, <sup>2</sup>Radiology, <sup>3</sup>Center for Medical Imaging and <sup>4</sup>Neuro Imaging Center, University of Groningen, University Medical Center Groningen, Groningen, the Netherlands.

\* both authors contributed equally to this work

**Correspondence:** Ron T. Gansevoort

**Email:** r.t.gansevoort@umcg.nl

**Supplementary Table 3.** Differences in TKV between T1 and T2 stratified according to liver volume (PLD classification) [1].

|                            | <b>Mild (n=60)</b><br><b>(htTLV&lt;1600 mL/m)</b> |                     | <b>Moderate (n=16)</b><br><b>(htTLV≥1600 and &lt;3200 mL/m)</b> |                     | <b>Severe (n=4)</b><br><b>(htTLV≥3200 mL/m)</b> |                   |
|----------------------------|---------------------------------------------------|---------------------|-----------------------------------------------------------------|---------------------|-------------------------------------------------|-------------------|
|                            | <b>T1</b>                                         | <b>T2</b>           | <b>T1</b>                                                       | <b>T2</b>           | <b>T1</b>                                       | <b>T2</b>         |
| <b>Left kidney volume</b>  | 1035 [636 - 1451]                                 | 1048 [629 - 1659]   | 986 [685 - 1236]                                                | 984 [678 - 1253]    | 688 [668 - 707]                                 | 650 [607 - 700]   |
| <b>Right kidney volume</b> | 919 [622 - 1320]                                  | 921 [610 - 1387]*   | 730 [577 - 1006]                                                | 748 [574 - 1064]*   | 433 [316 - 689]                                 | 441 [360 - 499]   |
| <b>Total kidney volume</b> | 1989 [1238 - 2789]                                | 1951 [1257 - 2961]* | 1716 [1271 - 2160]                                              | 1732 [1257 - 2289]* | 1112 [1001 - 1388]                              | 1065 [993 - 1199] |

Values are given as median [IQR]. *Abbreviations:* htTLV, height adjusted total liver volume. \* p<0.05
