# Supplementary material for: T1 vs. T2 weighted magnetic resonance imaging to assess total kidney volume in patients with autosomal dominant polycystic kidney disease
Source: Springer Nature journal article supplement (doi:10.1007/s00261-017-1285-2), 2017-09-04
Supplement: MOESM6 [file 14976096]

**T1 versus T2 weighted Magnetic Resonance Imaging  
to Assess Total Kidney Volume  
in Patients with Autosomal Dominant Polycystic Kidney Disease**

***Journal: Abdominal Radiology***

Maatje D.A. van Gastel \*, BSc<sup>1</sup>; A. Lianne Messchendorp \*, MD<sup>1</sup>; Peter Kappert, MSc<sup>2</sup>; Merel A. Kaatee, BSc<sup>1,3</sup>; Marissa de Jong, BSc<sup>1</sup>; Remco J. Renken, MSc, PhD<sup>4</sup>; Gert J. ter Horst, MSc, PhD<sup>4</sup>; Shekar V.K. Mahesh, MD<sup>2</sup> and Ron T. Gansevoort, MD, PhD<sup>1</sup>.

On behalf of the DIPAK consortium

Departments of <sup>1</sup>Nephrology, <sup>2</sup>Radiology, <sup>3</sup>Center for Medical Imaging and <sup>4</sup>Neuro Imaging Center, University of Groningen, University Medical Center Groningen, Groningen, the Netherlands.

\* both authors contributed equally to this work

**Correspondence:** Ron T. Gansevoort

**Email:** r.t.gansevoort@umcg.nl

**Supplementary Table 6.** Intra- and interreader coefficients of variability in kidney volume measurements according to quartiles of T1 breath-hold trigger time.

|                     | Intrareader CV (%) |                    | Interreader CV (%) |                    |
|---------------------|--------------------|--------------------|--------------------|--------------------|
|                     | T1                 | T2                 | T1                 | T2                 |
| <b>Left kidney</b>  | P=0.6              | P=0.1              | P=0.5              | P=0.5              |
| 16.5 – 17.2 sec.    | 1.59 [1.10 - 2.26] | 0.54 [0.40 - 0.82] | 3.02 [1.62 - 4.42] | 0.93 [0.87 – 0.98] |
| 17.3 – 17.6 sec.    | 0.69 [0.56 - 3.64] | 0.73 [0.22 - 0.88] | 2.37 [1.41 - 3.33] | 0.79 [0.34 – 1.25] |
| 17.7 – 18.5 sec.    | 1.10 [0.62 - 1.45] | 1.14 [0.50 - 1.93] | 1.19 [0.72 - 3.65] | 2.21 [0.95 - 2.60] |
| 18.6 – 19.5 sec.    | 0.94 [0.83 - 1.95] | 0.58 [0.41 - 1.16] | 4.02 [3.09 - 4.95] | 1.02 [0.43 - 1.61] |
| <b>Right kidney</b> | P=0.3              | P=0.9              | P=0.1              | P=0.8              |
| 16.5 – 17.2 sec.    | 1.95 [0.97 - 3.06] | 0.78 [0.25 - 1.01] | 1.90 [0.54 - 3.26] | 1.34 [0.76 - 1.92] |
| 17.3 – 17.6 sec.    | 1.73 [1.06 - 2.21] | 0.65 [0.15 - 1.25] | 0.56 [0.52 - 0.59] | 1.37 [0.34 - 2.41] |
| 17.7 – 18.5 sec.    | 1.20 [0.44 – 1.64] | 1.07 [0.14 - 1.40] | 2.00 [1.95 - 4.13] | 1.31 [0.90 - 1.85] |
| 18.6 – 19.5 sec.    | 1.84 [0.61 – 5.23] | 0.57 [0.41 - 1.16] | 10.82 [4.37-17.27] | 0.87 [0.74 - 1.00] |
| <b>Total kidney</b> | P=0.1              | P=0.3              | P=0.2              | P=0.9              |
| 16.5 – 17.2 sec.    | 1.84 [1.41 - 2.17] | 0.75 [0.10 - 1.53] | 2.46 [1.05 - 3.87] | 2.09 [1.76 - 2.42] |
| 17.3 – 17.6 sec.    | 1.16 [0.55 - 1.86] | 1.02 [0.86 - 1.63] | 1.35 [0.85 - 1.85] | 1.85 [1.04 - 2.67] |
| 17.7 – 18.5 sec.    | 0.83 [0.19 – 1.54] | 1.57 [0.40 - 2.87] | 1.53 [1.05 - 3.88] | 1.97 [1.54 - 5.09] |
| 18.6 – 19.5 sec.    | 1.30 [0.25 - 2.94] | 0.81 [0.56 - 2.30] | 6.38 [4.64 - 8.12] | 1.83 [1.48 - 2.19] |

Values are given as median [IQR] for intrareader CV and median [minimum-maximum] for interreader CV. P values show differences between the quartiles of T1 breath-hold trigger time, using a Kruskal Wallis Test. *Abbreviations:* CV, coefficient of variability; sec., seconds.
