# Supplementary material for: T1 vs. T2 weighted magnetic resonance imaging to assess total kidney volume in patients with autosomal dominant polycystic kidney disease
Source: Springer Nature journal article supplement (doi:10.1007/s00261-017-1285-2), 2017-09-04
Supplement: MOESM7 [file 14976096]

**T1 versus T2 weighted Magnetic Resonance Imaging  
to Assess Total Kidney Volume  
in Patients with Autosomal Dominant Polycystic Kidney Disease**

***Journal: Abdominal Radiology***

Maatje D.A. van Gastel \*, BSc<sup>1</sup>; A. Lianne Messchendorp \*, MD<sup>1</sup>; Peter Kappert, MSc<sup>2</sup>; Merel A. Kaatee, BSc<sup>1,3</sup>; Marissa de Jong, BSc<sup>1</sup>; Remco J. Renken, MSc, PhD<sup>4</sup>; Gert J. ter Horst, MSc, PhD<sup>4</sup>; Shekar V.K. Mahesh, MD<sup>2</sup> and Ron T. Gansevoort, MD, PhD<sup>1</sup>.

On behalf of the DIPAK consortium

Departments of <sup>1</sup>Nephrology, <sup>2</sup>Radiology, <sup>3</sup>Center for Medical Imaging and <sup>4</sup>Neuro Imaging Center, University of Groningen, University Medical Center Groningen, Groningen, the Netherlands.

\* both authors contributed equally to this work

**Correspondence:** Ron T. Gansevoort

**Email:** r.t.gansevoort@umcg.nl

**Supplementary Table 7.** Differences in kidney volume when measured using T1 or T2 weighted images for quartiles of breath hold trigger time of T1 weighted images.

|                     | Volumes (mL)       |                    | Differences in volume (mL) |           |                  | Differences in volume (%)        |           |                             |
|---------------------|--------------------|--------------------|----------------------------|-----------|------------------|----------------------------------|-----------|-----------------------------|
|                     | T1                 | T2                 | [T1 – T2]                  |           |                  | [(T1 – T2) / average T1 T2* 100] |           |                             |
|                     |                    |                    | Bias                       | Precision | <i>P value</i> * | Bias                             | Precision | <i>P value</i> <sup>#</sup> |
| <b>Left kidney</b>  |                    |                    |                            |           |                  |                                  |           |                             |
| 5.2 – 15.0 sec.     | 940 [584 - 1127]   | 951 [534 - 1110]   | 16.7                       | 46.3      | 0.2              | 2.1                              | 5.7       | 0.2                         |
| 15.1 – 17.5 sec.    | 711 [394 - 1265]   | 716 [403 - 1357]   | 38.7                       | 105.3     | 0.2              | 1.9                              | 5.4       | 0.2                         |
| 17.6 – 18.5 sec.    | 1149 [1042 - 1775] | 1195 [994 - 1821]  | -24.9                      | 55.4      | 0.1              | -1.9                             | 4.4       | 0.1                         |
| 18.6 – 26.0 sec.    | 971 [655 - 1220]   | 979 [654 - 1206]   | -3.0                       | 33.6      | 0.9              | 0.3                              | 3.4       | 0.8                         |
| <b>Right kidney</b> |                    |                    |                            |           |                  |                                  |           |                             |
| 5.2 – 15.0 sec.     | 845 [526 - 1038]   | 873 [521 - 1035]   | 4.2                        | 41.2      | 0.4              | 1.1                              | 5.3       | 0.4                         |
| 15.1 – 17.5 sec.    | 729 [358 - 1988]   | 505 [347 - 2032]   | -18.6                      | 109.5     | 0.1              | -0.6                             | 12.8      | 0.9                         |
| 17.6 – 18.5 sec.    | 1030 [801 - 1553]  | 1107 [835 - 1581]  | -42.8                      | 47.9      | 0.003            | -3.4                             | 3.6       | 0.002                       |
| 18.6 – 26.0 sec.    | 780 [497 - 1141]   | 812 [498 - 1205]   | -21.5                      | 35.2      | 0.02             | -1.5                             | 5.6       | 0.3                         |
| <b>Total kidney</b> |                    |                    |                            |           |                  |                                  |           |                             |
| 5.2 – 15.0 sec.     | 1932 [1139 - 2138] | 1851 [1042 - 2194] | 20.9                       | 82.1      | 0.3              | 1.6                              | 5.0       | 0.2                         |
| 15.1 – 17.5 sec.    | 1469 [766 - 3031]  | 1221 [744 - 3084]  | 20.2                       | 170.5     | 0.7              | 1.1                              | 6.7       | 0.5                         |
| 17.6 – 18.5 sec.    | 2130 [1976 - 3147] | 2246 [1961 - 3226] | -67.6                      | 90.9      | 0.01             | -2.6                             | 3.2       | 0.005                       |
| 18.6 – 26.0 sec.    | 1800 [1166 - 2368] | 1810 [1152 - 2394] | -24.5                      | 59.5      | 0.2              | -0.6                             | 3.9       | 0.6                         |

Values are given as median [IQR]. P values shown are: \* absolute differences (mL) between T1 and T2 weighted volumes using a paired Wilcoxon signed rank test; <sup>#</sup> percentage differences (%) between T1 and T2 weighted volumes using a one sample T-test. ANOVA showed no significant P for trend between quartiles of breath hold trigger time of T1 for absolute and percentage difference.
